# Supplementary material for: Ultrastable green fluorescence carbon dots with a high quantum yield for bioimaging and use as theranostic carriers
Source: Royal Society of Chemistry journal article supplement (doi:10.1039/c5tb00467e), 2015-01-01
Supplement: c5tb00467e1.pdf [file c5tb00467e1.pdf]

## Supporting Information

**Title** Ultrastable green fluorescence carbon dots with high quantum yield for bioimaging and use as theranostic carriers

*Chuanxu Yang\**, *Rasmus Peter Thomsen*, *Ryosuke Ogaki*, *Jørgen Kjems* and *Boon M. Teo\**

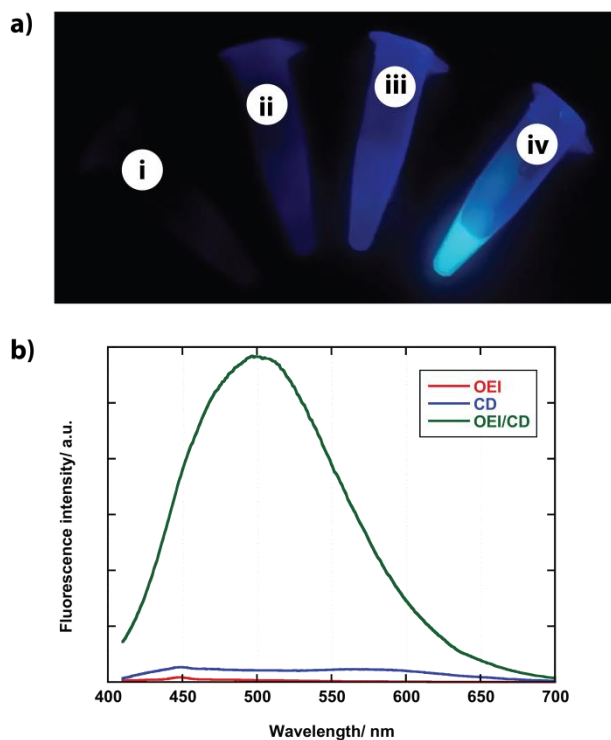

**Figure S1.** a) Photographs of (i) water, (ii) processed OEI, (iii) processed  $\beta$ CD and (iv) OEI/ $\beta$ CD Cdots under a UV lamp excited at 365 nm, b) fluorescence intensity of OEI,  $\beta$ CD and OEI/ $\beta$ CD Cdots using an excitation wavelength of 400 nm.

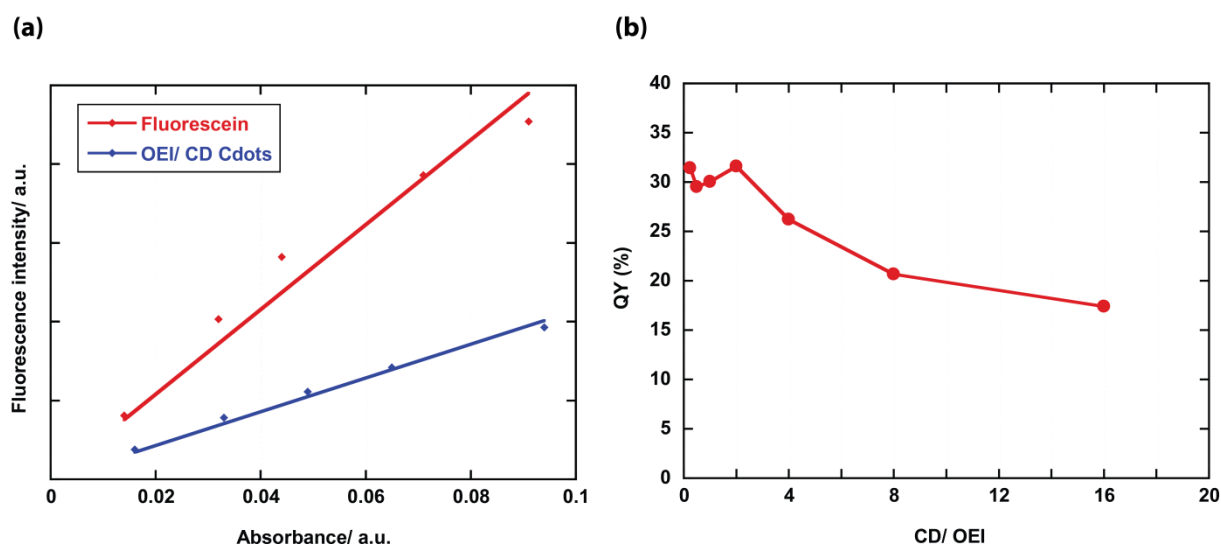

**Figure S2.** a) Integrated fluorescence intensity vs. absorbance of the fluorescein and Cdots, b) quantum yield of Cdots as a function of ratio of  $\beta$ CD/ OEI.

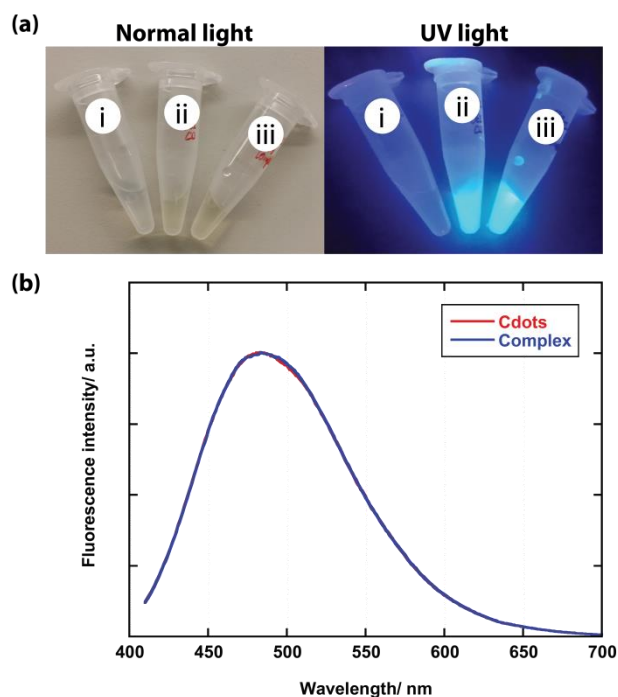

**Figure S3.** a) Photographs of (i) water, (ii) OEI/ $\beta$ CD Cdots and (iii) OEI/ $\beta$ CD complex under normal light and a UV lamp excited at 365 nm. b) fluorescence spectrum of the Cdots and OEI/CD complex, excitation wavelength 400 nm.

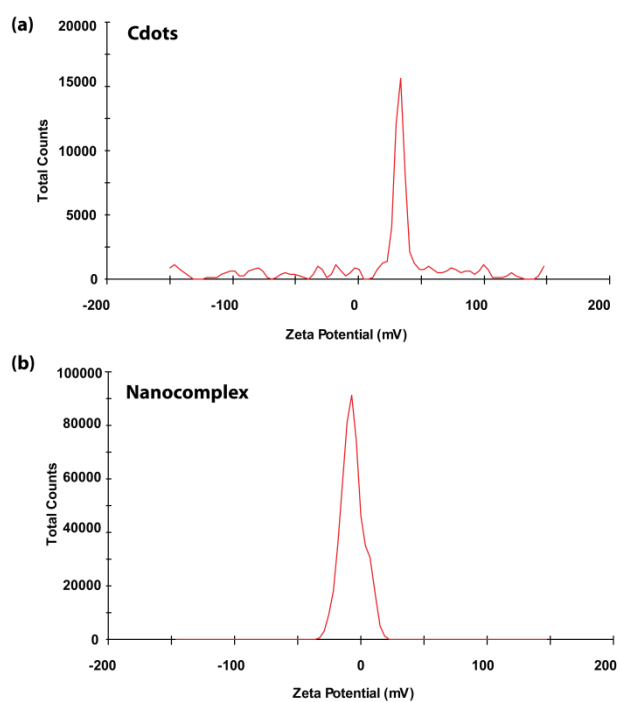

**Figure S4.** Zeta potential of a) Cdots and b) nanocomplex.

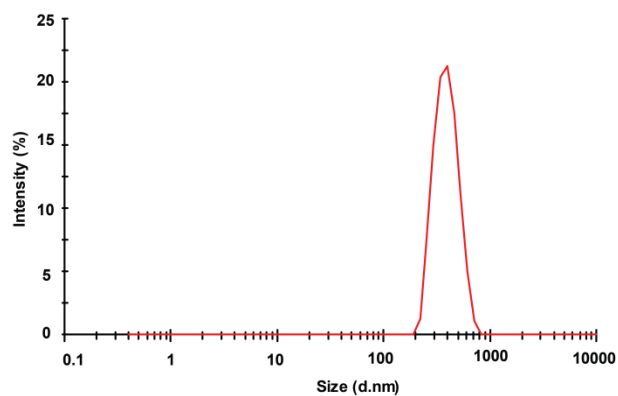

**Figure S5.** Particle size of Dox loaded nanocomplexes.

**Table S1.** Elemental composition of Cdots as determined by XPS measurements.

|       | elemental % |           |         |          |
|-------|-------------|-----------|---------|----------|
|       | C           | O         | N       | P        |
| Cdots | 36.8±0.6    | 46.7 ±0.7 | 7.8±0.5 | 8.7 ±0.3 |
